# Supplementary material
Source: ML conference proceedings conference paper supplement (https://openaccess.thecvf.com/content/ICCV_2017/html/Wang_Stereo_DSO_Large-Scale_ICCV_2017_paper.html)
Supplement: Supplementary file 2 [file Wang_Stereo_DSO_Large-Scale_ICCV_2017_supplemental.zip]

Archive with 3 entries (2 files):
- 1921-supp/
- 1921-supp/1921-supp.mp4
- 1921-supp/1921-supp.pdf
